# Supplementary material for: Effects of Mixed Pasture Legume Phytoestrogens on Superovulatory Response and Embryo Quality in Angus Cows
Source: MDPI journal article supplement (doi:10.3390/ani14071125), 2024-04-07
Supplement: s1 [file s1]

**Supplementary Materials:** The following supporting information can be downloaded at: [www.mdpi.com/xxx/s1](http://www.mdpi.com/xxx/s1), Figure S1: title; Table S1: title; Video S1: title.

**Table S1.** Dynamic multiple reaction mode (dMRM) parameters used for quantifying coumestrol and selected isoflavones in plasma and pasture samples via UHPLC-MS-QQQ. All compounds used an acceleration voltage of 5 eV.

| Compound     | Precursor ion ( <i>m/z</i> ) | Product ion ( <i>m/z</i> ) | Retention time (min) | Retention time window (min) | Fragmentor voltage (eV) | Collision energy (eV) |
|--------------|------------------------------|----------------------------|----------------------|-----------------------------|-------------------------|-----------------------|
| daidzein     | 253                          | 132                        | 5.9                  | 0.8                         | 135                     | 55                    |
| genistein    | 269                          | 133                        | 8.1                  | 0.7                         | 135                     | 40                    |
| coumestrol   | 267                          | 91                         | 8.37                 | 0.5                         | 135                     | 50                    |
| formononetin | 267                          | 251                        | 9.3                  | 0.6                         | 135                     | 35                    |
| biochanin A  | 283                          | 268                        | 11.1                 | 0.6                         | 135                     | 30                    |
